# Supplementary material for: Deciphering the Interactions of SARS-CoV-2 Proteins with Human Ion Channels Using Machine-Learning-Based Methods
Source: MDPI journal article supplement (doi:10.3390/pathogens11020259), 2022-02-17
Supplement: s1 [file s1]

# Deciphering the Interactions of SARS-CoV-2 Proteins with Human Ion Channels Using Machine Learning-Based Method

Nupur S. Munjal <sup>1</sup>, Dikscha Sapra <sup>1</sup>, K. T. Shreya Parthasarathi <sup>1</sup>, Abhishek Goyal <sup>1</sup>, Akhilesh Pandey <sup>2,3,4</sup>, Manidipa Banerjee <sup>5</sup> and Jyoti Sharma <sup>1,6,\*</sup>

<sup>1</sup> Institute of Bioinformatics, International Technology Park, Bangalore 560066, India; nupur@ibioinformatics.org (N.S.M.); dikschasapra@gmail.com (D.S.); shreya@ibioinformatics.org (K.T.S.P.); abhishek.goyal.in@gmail.com (A.G.)

<sup>2</sup> Center for Molecular Medicine, National Institute of Mental Health and Neurosciences (NIMHANS), Hosur Road, Bangalore 560029, India; pandey.akhilesh@mayo.edu

<sup>3</sup> Department of Laboratory Medicine and Pathology, Mayo Clinic, Rochester, MN 55905, USA

<sup>4</sup> Center for Individualized Medicine, Mayo Clinic, Rochester, MN 55905, USA

<sup>5</sup> Kusuma School of Biological Sciences, Indian Institute of Technology Delhi, Hauz Khas, New Delhi 110016, India; manidipa.banerjee@bioschool.iitd.ac.in

<sup>6</sup> Manipal Academy of Higher Education (MAHE), Manipal, Karnataka 576104, India

\* Correspondence: jyoti@ibioinformatics.org

## Input Dataset for PPI-MetaGO

193 PPIs of SARS-CoV-2 proteins with HICs were parsed from BioGRID database (release 4.92.192). The interactions of ORF14 and ORF3b with HICs were removed from the input. The dataset included 202 interactions; 181 from SARS-CoV-2 - HICs interactions and 21 from SARS-CoV-2 - SARS-CoV-2 interactions.

**Table S1:** A list of protein-protein interactions of SARS-CoV-2 - human ion channels and SARS-CoV-2 - SARS-CoV-2 proteins from BioGRID database (release 4.92.192) with the experimental evidences.

| Official Symbol<br>Interactor A | Official Symbol<br>Interactor B | Experimental System | Author                      | Publication Source            | Predicted binding affinity in kcal/mol (ISLAND) |
|---------------------------------|---------------------------------|---------------------|-----------------------------|-------------------------------|-------------------------------------------------|
| E                               | ANO6                            | Proximity Label-MS  | Samavarchi-Tehrani P (2020) | DOI:10.1101/2020.09.03.282103 | -10.727                                         |
| E                               | ITPR2                           | Proximity Label-MS  | Samavarchi-Tehrani P (2020) | DOI:10.1101/2020.09.03.282103 | -10.568                                         |
| E                               | ITPR3                           | Proximity           | Samavarchi-Tehrani P        | DOI:10.1101/20                | -10.469                                         |

|   |        |                       |                                    |                                   |         |
|---|--------|-----------------------|------------------------------------|-----------------------------------|---------|
|   |        | Label-MS              | (2020)                             | 20.09.03.282103                   |         |
| E | KCNN4  | Proximity<br>Label-MS | Samavarchi-<br>Tehrani P<br>(2020) | DOI:10.1101/20<br>20.09.03.282103 | -10.879 |
| E | PKD2   | Proximity<br>Label-MS | Samavarchi-<br>Tehrani P<br>(2020) | DOI:10.1101/20<br>20.09.03.282103 | -10.617 |
| E | TRPM4  | Proximity<br>Label-MS | Samavarchi-<br>Tehrani P<br>(2020) | DOI:10.1101/20<br>20.09.03.282103 | -11.092 |
| E | TRPM7  | Proximity<br>Label-MS | Samavarchi-<br>Tehrani P<br>(2020) | DOI:10.1101/20<br>20.09.03.282103 | -10.87  |
| E | ANO10  | Proximity<br>Label-MS | Samavarchi-<br>Tehrani P<br>(2020) | DOI:10.1101/20<br>20.09.03.282103 | -10.444 |
| E | LRRC8D | Proximity<br>Label-MS | Samavarchi-<br>Tehrani P<br>(2020) | DOI:10.1101/20<br>20.09.03.282103 | -11.13  |
| E | VDAC3  | Proximity<br>Label-MS | Samavarchi-<br>Tehrani P<br>(2020) | DOI:10.1101/20<br>20.09.03.282103 | -11.223 |
| E | ITPR1  | Proximity<br>Label-MS | Laurent E<br>(2020)                | DOI:10.1101/20<br>20.08.28.272955 | -10.247 |
| E | KCNJ11 | Proximity<br>Label-MS | Laurent E<br>(2020)                | DOI:10.1101/20<br>20.08.28.272955 | -11.158 |
| E | KCNJ8  | Proximity<br>Label-MS | Laurent E<br>(2020)                | DOI:10.1101/20<br>20.08.28.272955 | -10.835 |
| E | LRRC8B | Proximity<br>Label-MS | Laurent E<br>(2020)                | DOI:10.1101/20<br>20.08.28.272955 | -10.87  |
| E | ASIC1  | Proximity<br>Label-MS | St-Germain JR<br>(2020)            | DOI:10.1101/20<br>20.08.28.269175 | -11.201 |
| E | CLCN7  | Proximity             | St-Germain JR                      | DOI:10.1101/20                    | -10.519 |

|   |        |                        |                                    |                                   |         |
|---|--------|------------------------|------------------------------------|-----------------------------------|---------|
|   |        | Label-MS               | (2020)                             | 20.08.28.269175                   |         |
| E | GJC1   | Proximity<br>Label-MS  | St-Germain JR<br>(2020)            | DOI:10.1101/20<br>20.08.28.269175 | -10.366 |
| E | KCNB2  | Proximity<br>Label-MS  | St-Germain JR<br>(2020)            | DOI:10.1101/20<br>20.08.28.269175 | -10.87  |
| E | KCNG1  | Proximity<br>Label-MS  | St-Germain JR<br>(2020)            | DOI:10.1101/20<br>20.08.28.269175 | -10.344 |
| E | LRRC8A | Proximity<br>Label-MS  | St-Germain JR<br>(2020)            | DOI:10.1101/20<br>20.08.28.269175 | -10.568 |
| E | LRRC8C | Proximity<br>Label-MS  | St-Germain JR<br>(2020)            | DOI:10.1101/20<br>20.08.28.269175 | -10.835 |
| M | ANO6   | Affinity<br>Capture-MS | Gordon DE<br>(2020)                | PUBMED:3235<br>3859               | -10.471 |
| M | CLCN7  | Proximity<br>Label-MS  | Samavarchi-<br>Tehrani P<br>(2020) | DOI:10.1101/20<br>20.09.03.282103 | -10.221 |
| M | GABRA5 | Proximity<br>Label-MS  | Samavarchi-<br>Tehrani P<br>(2020) | DOI:10.1101/20<br>20.09.03.282103 | -10.738 |
| M | GJA1   | Proximity<br>Label-MS  | Samavarchi-<br>Tehrani P<br>(2020) | DOI:10.1101/20<br>20.09.03.282103 | -10.21  |
| M | ITPR3  | Proximity<br>Label-MS  | Samavarchi-<br>Tehrani P<br>(2020) | DOI:10.1101/20<br>20.09.03.282103 | -10.379 |
| M | KCNN4  | Proximity<br>Label-MS  | Samavarchi-<br>Tehrani P<br>(2020) | DOI:10.1101/20<br>20.09.03.282103 | -10.422 |
| M | PKD2   | Proximity<br>Label-MS  | Samavarchi-<br>Tehrani P<br>(2020) | DOI:10.1101/20<br>20.09.03.282103 | -10.368 |
| M | TPCN1  | Proximity<br>Label-MS  | Samavarchi-<br>Tehrani P           | DOI:10.1101/20<br>20.09.03.282103 | -10.421 |

|   |        |                       |                                    |                                   |         |
|---|--------|-----------------------|------------------------------------|-----------------------------------|---------|
|   |        |                       | (2020)                             |                                   |         |
| M | TRPM4  | Proximity<br>Label-MS | Samavarchi-<br>Tehrani P<br>(2020) | DOI:10.1101/20<br>20.09.03.282103 | -10.896 |
| M | ANO10  | Proximity<br>Label-MS | Samavarchi-<br>Tehrani P<br>(2020) | DOI:10.1101/20<br>20.09.03.282103 | -10.091 |
| M | VDAC2  | Proximity<br>Label-MS | Samavarchi-<br>Tehrani P<br>(2020) | DOI:10.1101/20<br>20.09.03.282103 | -10.962 |
| M | VDAC3  | Proximity<br>Label-MS | Samavarchi-<br>Tehrani P<br>(2020) | DOI:10.1101/20<br>20.09.03.282103 | -10.676 |
| M | GRID1  | Proximity<br>Label-MS | Laurent E<br>(2020)                | DOI:10.1101/20<br>20.08.28.272955 | -10.838 |
| M | ITPR1  | Proximity<br>Label-MS | Laurent E<br>(2020)                | DOI:10.1101/20<br>20.08.28.272955 | -10.162 |
| M | KCNQ5  | Proximity<br>Label-MS | Laurent E<br>(2020)                | DOI:10.1101/20<br>20.08.28.272955 | -10.87  |
| M | LRRC8A | Proximity<br>Label-MS | Laurent E<br>(2020)                | DOI:10.1101/20<br>20.08.28.272955 | -10.283 |
| M | ITPR2  | Proximity<br>Label-MS | St-Germain JR<br>(2020)            | DOI:10.1101/20<br>20.08.28.269175 | -10.48  |
| M | KCNB2  | Proximity<br>Label-MS | St-Germain JR<br>(2020)            | DOI:10.1101/20<br>20.08.28.269175 | -10.87  |
| M | KCNJ11 | Proximity<br>Label-MS | St-Germain JR<br>(2020)            | DOI:10.1101/20<br>20.08.28.269175 | -10.676 |
| M | KCNJ8  | Proximity<br>Label-MS | St-Germain JR<br>(2020)            | DOI:10.1101/20<br>20.08.28.269175 | -10.348 |
| M | LRRC8C | Proximity<br>Label-MS | St-Germain JR<br>(2020)            | DOI:10.1101/20<br>20.08.28.269175 | -10.565 |
| M | LRRC8D | Proximity             | St-Germain JR                      | DOI:10.1101/20                    | -10.881 |

|       |        |                        |                                    |                                   |         |
|-------|--------|------------------------|------------------------------------|-----------------------------------|---------|
|       |        | Label-MS               | (2020)                             | 20.08.28.269175                   |         |
| M     | TRPM7  | Proximity<br>Label-MS  | St-Germain JR<br>(2020)            | DOI:10.1101/20<br>20.08.28.269175 | -10.87  |
| S     | ANO6   | Proximity<br>Label-MS  | Samavarchi-<br>Tehrani P<br>(2020) | DOI:10.1101/20<br>20.09.03.282103 | -11.72  |
| S     | KCNN4  | Proximity<br>Label-MS  | Samavarchi-<br>Tehrani P<br>(2020) | DOI:10.1101/20<br>20.09.03.282103 | -11.982 |
| S     | TRPM4  | Proximity<br>Label-MS  | Samavarchi-<br>Tehrani P<br>(2020) | DOI:10.1101/20<br>20.09.03.282103 | -11.878 |
| S     | CLCN2  | Proximity<br>Label-MS  | Laurent E<br>(2020)                | DOI:10.1101/20<br>20.08.28.272955 | -11.823 |
| S     | KCNQ5  | Proximity<br>Label-MS  | Laurent E<br>(2020)                | DOI:10.1101/20<br>20.08.28.272955 | -10.87  |
| S     | ANO10  | Proximity<br>Label-MS  | St-Germain JR<br>(2020)            | DOI:10.1101/20<br>20.08.28.269175 | -11.677 |
| S     | ITPR3  | Proximity<br>Label-MS  | St-Germain JR<br>(2020)            | DOI:10.1101/20<br>20.08.28.269175 | -10.988 |
| S     | KCNB2  | Proximity<br>Label-MS  | St-Germain JR<br>(2020)            | DOI:10.1101/20<br>20.08.28.269175 | -10.87  |
| S     | TRPM7  | Proximity<br>Label-MS  | St-Germain JR<br>(2020)            | DOI:10.1101/20<br>20.08.28.269175 | -10.87  |
| ORF3a | ANO6   | Affinity<br>Capture-MS | Stukalov A<br>(2020)               | DOI:10.1101/20<br>20.06.17.156455 | -10.717 |
| ORF3a | LRRC8D | Affinity<br>Capture-MS | Stukalov A<br>(2020)               | DOI:10.1101/20<br>20.06.17.156455 | -11.124 |
| ORF3a | CLCN7  | Affinity<br>Capture-MS | Stukalov A<br>(2020)               | DOI:10.1101/20<br>20.06.17.156455 | -10.505 |
| ORF3a | LRRC8A | Affinity<br>Capture-MS | Stukalov A<br>(2020)               | DOI:10.1101/20<br>20.06.17.156455 | -10.555 |

|       |        |                       |                                    |                                   |         |
|-------|--------|-----------------------|------------------------------------|-----------------------------------|---------|
| ORF3a | VDAC2  | Proximity<br>Label-MS | Samavarchi-<br>Tehrani P<br>(2020) | DOI:10.1101/20<br>20.09.03.282103 | -11.454 |
| ORF3a | VDAC3  | Proximity<br>Label-MS | Samavarchi-<br>Tehrani P<br>(2020) | DOI:10.1101/20<br>20.09.03.282103 | -11.219 |
| ORF6  | ANO6   | Proximity<br>Label-MS | Samavarchi-<br>Tehrani P<br>(2020) | DOI:10.1101/20<br>20.09.03.282103 | -10.402 |
| ORF6  | ITPR3  | Proximity<br>Label-MS | Samavarchi-<br>Tehrani P<br>(2020) | DOI:10.1101/20<br>20.09.03.282103 | -10.355 |
| ORF6  | VDAC3  | Proximity<br>Label-MS | Samavarchi-<br>Tehrani P<br>(2020) | DOI:10.1101/20<br>20.09.03.282103 | -10.509 |
| ORF6  | TRPM7  | Proximity<br>Label-MS | St-Germain JR<br>(2020)            | DOI:10.1101/20<br>20.08.28.269175 | -10.87  |
| ORF7a | CLCN7  | Proximity<br>Label-MS | Samavarchi-<br>Tehrani P<br>(2020) | DOI:10.1101/20<br>20.09.03.282103 | -9.934  |
| ORF7a | ANO6   | Proximity<br>Label-MS | Samavarchi-<br>Tehrani P<br>(2020) | DOI:10.1101/20<br>20.09.03.282103 | -10.218 |
| ORF7a | GABRA5 | Proximity<br>Label-MS | Samavarchi-<br>Tehrani P<br>(2020) | DOI:10.1101/20<br>20.09.03.282103 | -10.26  |
| ORF7a | GJA1   | Proximity<br>Label-MS | Samavarchi-<br>Tehrani P<br>(2020) | DOI:10.1101/20<br>20.09.03.282103 | -9.747  |
| ORF7a | ITPR1  | Proximity<br>Label-MS | Samavarchi-<br>Tehrani P<br>(2020) | DOI:10.1101/20<br>20.09.03.282103 | -10.078 |
| ORF7a | ITPR2  | Proximity<br>Label-MS | Samavarchi-<br>Tehrani P           | DOI:10.1101/20<br>20.09.03.282103 | -10.392 |

|       |        |                       |                                    |                                   |         |
|-------|--------|-----------------------|------------------------------------|-----------------------------------|---------|
|       |        |                       | (2020)                             |                                   |         |
| ORF7a | ITPR3  | Proximity<br>Label-MS | Samavarchi-<br>Tehrani P<br>(2020) | DOI:10.1101/20<br>20.09.03.282103 | -10.289 |
| ORF7a | KCNN4  | Proximity<br>Label-MS | Samavarchi-<br>Tehrani P<br>(2020) | DOI:10.1101/20<br>20.09.03.282103 | -9.969  |
| ORF7a | ASIC1  | Proximity<br>Label-MS | Samavarchi-<br>Tehrani P<br>(2020) | DOI:10.1101/20<br>20.09.03.282103 | -10.518 |
| ORF7a | PKD2   | Proximity<br>Label-MS | Samavarchi-<br>Tehrani P<br>(2020) | DOI:10.1101/20<br>20.09.03.282103 | -10.124 |
| ORF7a | TPCN1  | Proximity<br>Label-MS | Samavarchi-<br>Tehrani P<br>(2020) | DOI:10.1101/20<br>20.09.03.282103 | -10.14  |
| ORF7a | TRPM4  | Proximity<br>Label-MS | Samavarchi-<br>Tehrani P<br>(2020) | DOI:10.1101/20<br>20.09.03.282103 | -10.695 |
| ORF7a | ANO10  | Proximity<br>Label-MS | Samavarchi-<br>Tehrani P<br>(2020) | DOI:10.1101/20<br>20.09.03.282103 | -9.756  |
| ORF7a | LRRC8A | Proximity<br>Label-MS | Samavarchi-<br>Tehrani P<br>(2020) | DOI:10.1101/20<br>20.09.03.282103 | -10.007 |
| ORF7a | HCN2   | Proximity<br>Label-MS | Samavarchi-<br>Tehrani P<br>(2020) | DOI:10.1101/20<br>20.09.03.282103 | -10.467 |
| ORF7a | SCN9A  | Proximity<br>Label-MS | Samavarchi-<br>Tehrani P<br>(2020) | DOI:10.1101/20<br>20.09.03.282103 | -10.087 |
| ORF7a | VDAC3  | Proximity<br>Label-MS | Samavarchi-<br>Tehrani P<br>(2020) | DOI:10.1101/20<br>20.09.03.282103 | -10.095 |

|       |        |                     |                      |                               |         |
|-------|--------|---------------------|----------------------|-------------------------------|---------|
| ORF7a | GLRB   | Proximity Label-MS  | Laurent E (2020)     | DOI:10.1101/2020.08.28.272955 | -10.268 |
| ORF7a | KCNJ11 | Proximity Label-MS  | Laurent E (2020)     | DOI:10.1101/2020.08.28.272955 | -10.173 |
| ORF7a | LRRC8B | Proximity Label-MS  | Laurent E (2020)     | DOI:10.1101/2020.08.28.272955 | -10.87  |
| ORF7a | LRRC8D | Proximity Label-MS  | St-Germain JR (2020) | DOI:10.1101/2020.08.28.269175 | -10.625 |
| ORF7a | TRPM7  | Proximity Label-MS  | St-Germain JR (2020) | DOI:10.1101/2020.08.28.269175 | -10.87  |
| ORF7a | CHRNA5 | Proximity Label-MS  | St-Germain JR (2020) | DOI:10.1101/2020.08.28.269175 | -9.938  |
| ORF7a | GJC1   | Proximity Label-MS  | St-Germain JR (2020) | DOI:10.1101/2020.08.28.269175 | -9.347  |
| ORF7a | KCNB2  | Proximity Label-MS  | St-Germain JR (2020) | DOI:10.1101/2020.08.28.269175 | -10.87  |
| ORF7a | LRRC8B | Proximity Label-MS  | St-Germain JR (2020) | DOI:10.1101/2020.08.28.269175 | -10.87  |
| ORF7a | LRRC8C | Proximity Label-MS  | St-Germain JR (2020) | DOI:10.1101/2020.08.28.269175 | -10.295 |
| ORF7b | ANO6   | Affinity Capture-MS | Stukalov A (2020)    | DOI:10.1101/2020.06.17.156455 | -10.454 |
| ORF7b | CACNG6 | Affinity Capture-MS | Stukalov A (2020)    | DOI:10.1101/2020.06.17.156455 | -10.685 |
| ORF7b | TRPM4  | Affinity Capture-MS | Stukalov A (2020)    | DOI:10.1101/2020.06.17.156455 | -10.883 |
| ORF7b | LRRC8A | Affinity Capture-MS | Stukalov A (2020)    | DOI:10.1101/2020.06.17.156455 | -10.264 |
| ORF7b | GJA1   | Affinity Capture-MS | Stukalov A (2020)    | DOI:10.1101/2020.06.17.156455 | -10.183 |
| ORF7b | CLCN7  | Proximity Label-MS  | Samavarchi-Tehrani P | DOI:10.1101/2020.09.03.282103 | -10.2   |



|       |        |                       |                                    |                                   |         |
|-------|--------|-----------------------|------------------------------------|-----------------------------------|---------|
|       |        |                       | (2020)                             |                                   |         |
| ORF7b | GABRA5 | Proximity<br>Label-MS | Samavarchi-<br>Tehrani P<br>(2020) | DOI:10.1101/20<br>20.09.03.282103 | -10.707 |
| ORF7b | ITPR1  | Proximity<br>Label-MS | Samavarchi-<br>Tehrani P<br>(2020) | DOI:10.1101/20<br>20.09.03.282103 | -10.157 |
| ORF7b | ITPR2  | Proximity<br>Label-MS | Samavarchi-<br>Tehrani P<br>(2020) | DOI:10.1101/20<br>20.09.03.282103 | -10.475 |
| ORF7b | ITPR3  | Proximity<br>Label-MS | Samavarchi-<br>Tehrani P<br>(2020) | DOI:10.1101/20<br>20.09.03.282103 | -10.373 |
| ORF7b | KCNN4  | Proximity<br>Label-MS | Samavarchi-<br>Tehrani P<br>(2020) | DOI:10.1101/20<br>20.09.03.282103 | -10.389 |
| ORF7b | PKD2   | Proximity<br>Label-MS | Samavarchi-<br>Tehrani P<br>(2020) | DOI:10.1101/20<br>20.09.03.282103 | -10.352 |
| ORF7b | TPCN1  | Proximity<br>Label-MS | Samavarchi-<br>Tehrani P<br>(2020) | DOI:10.1101/20<br>20.09.03.282103 | -10.402 |
| ORF7b | TRPM7  | Proximity<br>Label-MS | Samavarchi-<br>Tehrani P<br>(2020) | DOI:10.1101/20<br>20.09.03.282103 | -10.87  |
| ORF7b | ANO10  | Proximity<br>Label-MS | Samavarchi-<br>Tehrani P<br>(2020) | DOI:10.1101/20<br>20.09.03.282103 | -10.066 |
| ORF7b | LRRC8D | Proximity<br>Label-MS | Samavarchi-<br>Tehrani P<br>(2020) | DOI:10.1101/20<br>20.09.03.282103 | -10.866 |
| ORF7b | ANO8   | Proximity<br>Label-MS | Samavarchi-<br>Tehrani P<br>(2020) | DOI:10.1101/20<br>20.09.03.282103 | -10.398 |

|       |          |                    |                             |                               |         |
|-------|----------|--------------------|-----------------------------|-------------------------------|---------|
| ORF7b | HCN2     | Proximity Label-MS | Samavarchi-Tehrani P (2020) | DOI:10.1101/2020.09.03.282103 | -10.731 |
| ORF7b | VDAC3    | Proximity Label-MS | Samavarchi-Tehrani P (2020) | DOI:10.1101/2020.09.03.282103 | -10.636 |
| ORF7b | CLCN2    | Proximity Label-MS | Laurent E (2020)            | DOI:10.1101/2020.08.28.272955 | -10.598 |
| ORF7b | GRID1    | Proximity Label-MS | Laurent E (2020)            | DOI:10.1101/2020.08.28.272955 | -10.823 |
| ORF7b | LRRC8B   | Proximity Label-MS | Laurent E (2020)            | DOI:10.1101/2020.08.28.272955 | -10.87  |
| ORF7b | ASIC1    | Proximity Label-MS | St-Germain JR (2020)        | DOI:10.1101/2020.08.28.269175 | -10.846 |
| ORF7b | LRRC8C   | Proximity Label-MS | St-Germain JR (2020)        | DOI:10.1101/2020.08.28.269175 | -10.547 |
| ORF7b | LRRC8E   | Proximity Label-MS | St-Germain JR (2020)        | DOI:10.1101/2020.08.28.269175 | -10.87  |
| ORF8  | ANO6     | Proximity Label-MS | Samavarchi-Tehrani P (2020) | DOI:10.1101/2020.09.03.282103 | -10.87  |
| ORF8  | TRPM4    | Proximity Label-MS | Samavarchi-Tehrani P (2020) | DOI:10.1101/2020.09.03.282103 | -10.87  |
| ORF8  | LRRC8D   | Proximity Label-MS | Samavarchi-Tehrani P (2020) | DOI:10.1101/2020.09.03.282103 | -10.87  |
| ORF8  | CACNA2D1 | Proximity Label-MS | Samavarchi-Tehrani P (2020) | DOI:10.1101/2020.09.03.282103 | -10.87  |
| ORF8  | LRRC8E   | Proximity Label-MS | Samavarchi-Tehrani P (2020) | DOI:10.1101/2020.09.03.282103 | -10.894 |

|      |        |                       |                                    |                                   |         |
|------|--------|-----------------------|------------------------------------|-----------------------------------|---------|
| ORF8 | LRRC8A | Proximity<br>Label-MS | Laurent E<br>(2020)                | DOI:10.1101/20<br>20.08.28.272955 | -9.884  |
| ORF8 | ANO10  | Proximity<br>Label-MS | St-Germain JR<br>(2020)            | DOI:10.1101/20<br>20.08.28.269175 | -10.402 |
| ORF8 | ASIC1  | Proximity<br>Label-MS | St-Germain JR<br>(2020)            | DOI:10.1101/20<br>20.08.28.269175 | -10.87  |
| ORF8 | CLCN7  | Proximity<br>Label-MS | St-Germain JR<br>(2020)            | DOI:10.1101/20<br>20.08.28.269175 | -10.843 |
| ORF8 | ITPR2  | Proximity<br>Label-MS | St-Germain JR<br>(2020)            | DOI:10.1101/20<br>20.08.28.269175 | -10.87  |
| ORF8 | ITPR3  | Proximity<br>Label-MS | St-Germain JR<br>(2020)            | DOI:10.1101/20<br>20.08.28.269175 | -10.87  |
| ORF8 | KCNB2  | Proximity<br>Label-MS | St-Germain JR<br>(2020)            | DOI:10.1101/20<br>20.08.28.269175 | -10.87  |
| ORF8 | LRRC8C | Proximity<br>Label-MS | St-Germain JR<br>(2020)            | DOI:10.1101/20<br>20.08.28.269175 | -10.232 |
| ORF8 | MCOLN3 | Proximity<br>Label-MS | St-Germain JR<br>(2020)            | DOI:10.1101/20<br>20.08.28.269175 | -10.87  |
| ORF8 | TRPM7  | Proximity<br>Label-MS | St-Germain JR<br>(2020)            | DOI:10.1101/20<br>20.08.28.269175 | -10.87  |
| nsp3 | KCNJ11 | Proximity<br>Label-MS | St-Germain JR<br>(2020)            | DOI:10.1101/20<br>20.08.28.269175 | -11.235 |
| nsp4 | ANO6   | Proximity<br>Label-MS | Samavarchi-<br>Tehrani P<br>(2020) | DOI:10.1101/20<br>20.09.03.282103 | -10.605 |
| nsp4 | GABRA5 | Proximity<br>Label-MS | Samavarchi-<br>Tehrani P<br>(2020) | DOI:10.1101/20<br>20.09.03.282103 | -10.945 |
| nsp4 | GJA1   | Proximity<br>Label-MS | Samavarchi-<br>Tehrani P<br>(2020) | DOI:10.1101/20<br>20.09.03.282103 | -10.518 |
| nsp4 | ITPR1  | Proximity             | Samavarchi-<br>Tehrani P           | DOI:10.1101/20                    | -10.205 |

|      |        |                       |                                    |                                   |         |
|------|--------|-----------------------|------------------------------------|-----------------------------------|---------|
|      |        | Label-MS              | (2020)                             | 20.09.03.282103                   |         |
| nsp4 | ITPR2  | Proximity<br>Label-MS | Samavarchi-<br>Tehrani P<br>(2020) | DOI:10.1101/20<br>20.09.03.282103 | -10.523 |
| nsp4 | ITPR3  | Proximity<br>Label-MS | Samavarchi-<br>Tehrani P<br>(2020) | DOI:10.1101/20<br>20.09.03.282103 | -10.424 |
| nsp4 | KCNN4  | Proximity<br>Label-MS | Samavarchi-<br>Tehrani P<br>(2020) | DOI:10.1101/20<br>20.09.03.282103 | -10.673 |
| nsp4 | PKD2   | Proximity<br>Label-MS | Samavarchi-<br>Tehrani P<br>(2020) | DOI:10.1101/20<br>20.09.03.282103 | -10.503 |
| nsp4 | TRPM7  | Proximity<br>Label-MS | Samavarchi-<br>Tehrani P<br>(2020) | DOI:10.1101/20<br>20.09.03.282103 | -10.87  |
| nsp4 | ANO10  | Proximity<br>Label-MS | Samavarchi-<br>Tehrani P<br>(2020) | DOI:10.1101/20<br>20.09.03.282103 | -10.309 |
| nsp4 | LRRC8D | Proximity<br>Label-MS | Samavarchi-<br>Tehrani P<br>(2020) | DOI:10.1101/20<br>20.09.03.282103 | -10.992 |
| nsp4 | VDAC2  | Proximity<br>Label-MS | Samavarchi-<br>Tehrani P<br>(2020) | DOI:10.1101/20<br>20.09.03.282103 | -11.142 |
| nsp4 | VDAC3  | Proximity<br>Label-MS | Samavarchi-<br>Tehrani P<br>(2020) | DOI:10.1101/20<br>20.09.03.282103 | -10.93  |
| nsp4 | TRPA1  | Proximity<br>Label-MS | Samavarchi-<br>Tehrani P<br>(2020) | DOI:10.1101/20<br>20.09.03.282103 | -10.302 |
| nsp4 | ANO5   | Proximity<br>Label-MS | Laurent E<br>(2020)                | DOI:10.1101/20<br>20.08.28.272955 | -10.141 |

|      |        |                       |                                    |                                   |         |
|------|--------|-----------------------|------------------------------------|-----------------------------------|---------|
| nsp4 | CLCN2  | Proximity<br>Label-MS | Laurent E<br>(2020)                | DOI:10.1101/20<br>20.08.28.272955 | -10.743 |
| nsp4 | GRID1  | Proximity<br>Label-MS | Laurent E<br>(2020)                | DOI:10.1101/20<br>20.08.28.272955 | -10.946 |
| nsp4 | KCNQ5  | Proximity<br>Label-MS | Laurent E<br>(2020)                | DOI:10.1101/20<br>20.08.28.272955 | -10.87  |
| nsp4 | LRRC8B | Proximity<br>Label-MS | Laurent E<br>(2020)                | DOI:10.1101/20<br>20.08.28.272955 | -10.87  |
| nsp4 | TRPM4  | Proximity<br>Label-MS | Laurent E<br>(2020)                | DOI:10.1101/20<br>20.08.28.272955 | -10.984 |
| nsp4 | ASIC1  | Proximity<br>Label-MS | St-Germain JR<br>(2020)            | DOI:10.1101/20<br>20.08.28.269175 | -11.012 |
| nsp4 | CLCN7  | Proximity<br>Label-MS | St-Germain JR<br>(2020)            | DOI:10.1101/20<br>20.08.28.269175 | -10.393 |
| nsp4 | KCNB2  | Proximity<br>Label-MS | St-Germain JR<br>(2020)            | DOI:10.1101/20<br>20.08.28.269175 | -10.87  |
| nsp4 | LRRC8A | Proximity<br>Label-MS | St-Germain JR<br>(2020)            | DOI:10.1101/20<br>20.08.28.269175 | -10.444 |
| nsp4 | LRRC8C | Proximity<br>Label-MS | St-Germain JR<br>(2020)            | DOI:10.1101/20<br>20.08.28.269175 | -10.702 |
| nsp4 | LRRC8E | Proximity<br>Label-MS | St-Germain JR<br>(2020)            | DOI:10.1101/20<br>20.08.28.269175 | -10.87  |
| nsp5 | VDAC3  | Proximity<br>Label-MS | Samavarchi-<br>Tehrani P<br>(2020) | DOI:10.1101/20<br>20.09.03.282103 | -11.575 |
| nsp6 | GJC1   | Proximity<br>Label-MS | Samavarchi-<br>Tehrani P<br>(2020) | DOI:10.1101/20<br>20.09.03.282103 | -10.619 |
| nsp6 | CLCN7  | Proximity<br>Label-MS | Samavarchi-<br>Tehrani P<br>(2020) | DOI:10.1101/20<br>20.09.03.282103 | -10.752 |
| nsp6 | ANO6   | Proximity             | Samavarchi-<br>Tehrani P           | DOI:10.1101/20                    | -10.17  |

|      |        |                       |                                    |                                   |         |
|------|--------|-----------------------|------------------------------------|-----------------------------------|---------|
|      |        | Label-MS              | (2020)                             | 20.09.03.282103                   |         |
| nsp6 | GABRA5 | Proximity<br>Label-MS | Samavarchi-<br>Tehrani P<br>(2020) | DOI:10.1101/20<br>20.09.03.282103 | -10.678 |
| nsp6 | GJA1   | Proximity<br>Label-MS | Samavarchi-<br>Tehrani P<br>(2020) | DOI:10.1101/20<br>20.09.03.282103 | -10.588 |
| nsp6 | ITPR2  | Proximity<br>Label-MS | Samavarchi-<br>Tehrani P<br>(2020) | DOI:10.1101/20<br>20.09.03.282103 | -10.87  |
| nsp6 | ITPR3  | Proximity<br>Label-MS | Samavarchi-<br>Tehrani P<br>(2020) | DOI:10.1101/20<br>20.09.03.282103 | -10.87  |
| nsp6 | KCNN4  | Proximity<br>Label-MS | Samavarchi-<br>Tehrani P<br>(2020) | DOI:10.1101/20<br>20.09.03.282103 | -11.479 |
| nsp6 | PKD2   | Proximity<br>Label-MS | Samavarchi-<br>Tehrani P<br>(2020) | DOI:10.1101/20<br>20.09.03.282103 | -9.868  |
| nsp6 | TRPM4  | Proximity<br>Label-MS | Samavarchi-<br>Tehrani P<br>(2020) | DOI:10.1101/20<br>20.09.03.282103 | -10.87  |
| nsp6 | ANO10  | Proximity<br>Label-MS | Samavarchi-<br>Tehrani P<br>(2020) | DOI:10.1101/20<br>20.09.03.282103 | -10.349 |
| nsp6 | HCN2   | Proximity<br>Label-MS | Samavarchi-<br>Tehrani P<br>(2020) | DOI:10.1101/20<br>20.09.03.282103 | -10.87  |
| nsp6 | VDAC2  | Proximity<br>Label-MS | Samavarchi-<br>Tehrani P<br>(2020) | DOI:10.1101/20<br>20.09.03.282103 | -10.946 |
| nsp6 | VDAC3  | Proximity<br>Label-MS | Samavarchi-<br>Tehrani P<br>(2020) | DOI:10.1101/20<br>20.09.03.282103 | -10.933 |

|       |        |                      |                             |                               |         |
|-------|--------|----------------------|-----------------------------|-------------------------------|---------|
| nsp6  | LRRC8A | Proximity Label-MS   | Laurent E (2020)            | DOI:10.1101/2020.08.28.272955 | -9.868  |
| nsp6  | ASIC1  | Proximity Label-MS   | St-Germain JR (2020)        | DOI:10.1101/2020.08.28.269175 | -10.87  |
| nsp6  | KCNB2  | Proximity Label-MS   | St-Germain JR (2020)        | DOI:10.1101/2020.08.28.269175 | -10.87  |
| nsp6  | LRRC8C | Proximity Label-MS   | St-Germain JR (2020)        | DOI:10.1101/2020.08.28.269175 | -10.192 |
| nsp6  | LRRC8D | Proximity Label-MS   | St-Germain JR (2020)        | DOI:10.1101/2020.08.28.269175 | -10.87  |
| nsp6  | TRPM7  | Proximity Label-MS   | St-Germain JR (2020)        | DOI:10.1101/2020.08.28.269175 | -10.87  |
| nsp13 | VDAC3  | Proximity Label-MS   | Samavarchi-Tehrani P (2020) | DOI:10.1101/2020.09.03.282103 | -10.87  |
| nsp14 | VDAC3  | Proximity Label-MS   | Samavarchi-Tehrani P (2020) | DOI:10.1101/2020.09.03.282103 | -10.801 |
| nsp16 | CLIC1  | Proximity Label-MS   | Laurent E (2020)            | DOI:10.1101/2020.08.28.272955 | -10.3   |
| N     | E      | Two-hybrid           | Liang Q (2020)              | DOI:10.1101/2020.03.31.019216 | -10.897 |
| nsp10 | nsp16  | Co-crystal Structure | Wilamowski M (2020)         | DOI:10.1101/2020.08.14.251421 | -11.686 |
| nsp12 | nsp7   | Co-crystal Structure | Gao Y (2020)                | DOI:10.1101/2020.03.16.993386 | -11.117 |
| nsp12 | nsp8   | Co-crystal Structure | Gao Y (2020)                | DOI:10.1101/2020.03.16.993386 | -10.911 |
| nsp14 | nsp10  | Two-hybrid           | Liang Q (2020)              | DOI:10.1101/2020.03.31.019216 | -10.87  |
| nsp14 | nsp10  | Co-purification      | Baddock HT (2020)           | DOI:10.1101/2020.08.13.248211 | -10.87  |

|       |       |                      |                   |                               |         |
|-------|-------|----------------------|-------------------|-------------------------------|---------|
| nsp15 | nsp2  | Two-hybrid           | Liang Q (2020)    | DOI:10.1101/2020.03.31.019216 | -10.87  |
| nsp7  | nsp9  | Two-hybrid           | Liang Q (2020)    | DOI:10.1101/2020.03.31.019216 | -10.87  |
| nsp7  | ORF7a | Two-hybrid           | Liang Q (2020)    | DOI:10.1101/2020.03.31.019216 | -11.372 |
| nsp7  | nsp8  | Co-crystal Structure | Shi W (2020)      | DOI:10.1101/2020.07.30.229187 | -11.122 |
| nsp8  | ORF8  | Two-hybrid           | Liang Q (2020)    | DOI:10.1101/2020.03.31.019216 | -10.87  |
| ORF3a | E     | Two-hybrid           | Liang Q (2020)    | DOI:10.1101/2020.03.31.019216 | -10.932 |
| ORF6  | nsp14 | Two-hybrid           | Liang Q (2020)    | DOI:10.1101/2020.03.31.019216 | -10.87  |
| ORF6  | nsp3  | Affinity Capture-MS  | Stukalov A (2020) | DOI:10.1101/2020.06.17.156455 | -11.154 |
| ORF7a | N     | Affinity Capture-MS  | Stukalov A (2020) | DOI:10.1101/2020.06.17.156455 | -10.595 |
| ORF7b | nsp1  | Two-hybrid           | Liang Q (2020)    | DOI:10.1101/2020.03.31.019216 | -10.87  |
| ORF7b | nsp7  | Two-hybrid           | Liang Q (2020)    | DOI:10.1101/2020.03.31.019216 | -11.072 |



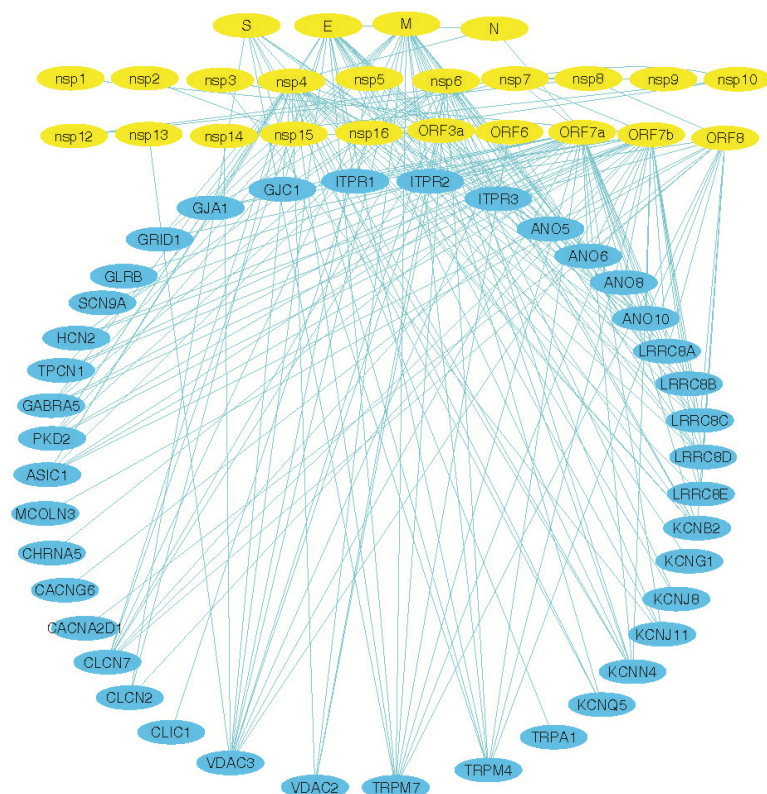

**Figure S1.** Schematic depiction of interactions of total SARS-CoV-2 proteins with human ion channels

**Table S2:** Function of human ion channels interacting with SARS-CoV-2 proteins

|   | Protein | Protein name                                 | Function                                          | References |
|---|---------|----------------------------------------------|---------------------------------------------------|------------|
| 1 | ITPR1   | inositol 1,4,5-trisphosphate receptor type 1 | Calcium transportation from endoplasmic reticulum | [1]        |
| 2 | ITPR2   | inositol 1,4,5-trisphosphate receptor type 2 | Calcium transportation from endoplasmic reticulum | [2,3]      |
| 3 | ITPR3   | inositol 1,4,5-trisphosphate receptor type 3 | Calcium transportation from endoplasmic reticulum | [4]        |

|    |        |                                                 |                                                                                                                         |         |
|----|--------|-------------------------------------------------|-------------------------------------------------------------------------------------------------------------------------|---------|
| 4  | ANO5   | anoctamin 5                                     | Transmembrane protein, it's a calcium activated chloride channel                                                        | [5]     |
| 5  | ANO6   | anoctamin 6                                     | Essential component for the calcium-dependent exposure of phosphatidylserine on the cell surface                        | [6-8]   |
| 6  | ANO8   | anoctamin 8                                     | Membrane contact sites formation in the ER/PM junctions                                                                 | [9]     |
| 7  | ANO10  | anoctamin 10                                    | Transmembrane protein, it's a calcium activated chloride channel                                                        | [10,11] |
| 8  | LRRC8A | leucine rich repeat containing 8 VRAC subunit A | Four-pass transmembrane protein that plays a role in B cell development                                                 | [12,13] |
| 9  | LRRC8B | leucine rich repeat containing 8 VRAC subunit B | Anion channel required to maintain a constant cell volume in response to extracellular or intracellular osmotic changes | [14-16] |
| 10 | LRRC8C | leucine rich repeat containing 8 VRAC subunit C | Plays a redundant role in the efflux of amino acids, such as aspartate and glutamate, in response to osmotic            | [14-16] |

|    |        |                                                               |                                                                                                                                                                               |         |
|----|--------|---------------------------------------------------------------|-------------------------------------------------------------------------------------------------------------------------------------------------------------------------------|---------|
|    |        |                                                               | stress. Channel activity requires LRRC8A plus at least one other family member (LRRC8B, LRRC8C, LRRC8D or LRRC8E)                                                             |         |
| 11 | LRRC8D | leucine rich repeat containing 8 VRAC subunit D               | Mediates the import of the antibiotic blasticidin-S into the cell                                                                                                             | [17]    |
| 12 | LRRC8E | leucine rich repeat containing 8 VRAC subunit E               | Anion channel required to maintain a constant cell volume in response to extracellular or intracellular osmotic changes                                                       | [18]    |
| 13 | KCNB2  | potassium voltage-gated channel subfamily B member 2          | Delayed rectifier potassium channel; functions include regulating neurotransmitter release, heart rate, insulin secretion, epithelial electrolyte transport, and cell volume. | [19,20] |
| 14 | KCNG1  | potassium voltage-gated channel modifier subfamily G member 1 | Form functional heterotetrameric channels with KCNB1; modulates the delayed rectifier voltage-gated                                                                           | [21]    |

|    |        |                                                          |                                                                                                                                                                                                |         |
|----|--------|----------------------------------------------------------|------------------------------------------------------------------------------------------------------------------------------------------------------------------------------------------------|---------|
|    |        |                                                          | potassium channel activation and deactivation rates of KCNB1                                                                                                                                   |         |
| 15 | KCNJ8  | potassium voltage-gated channel subfamily J member 8     | Protein has a greater tendency to allow potassium to flow into a cell rather than out of a cell                                                                                                | [22,23] |
| 16 | KCNJ11 | potassium voltage-gated channel subfamily J member 11    | Subunit of ATP-sensitive potassium channels; form cardiac and smooth muscle-type KATP channels with ABCC9. KCNJ11 forms the channel pore while ABCC9 is required for activation and regulation | [24-26] |
| 17 | KCNN4  | potassium calcium-activated channel subfamily N member 4 | Required for maximal calcium influx and proliferation during the reactivation of naive T-cells. Plays a role in the late stages of EGF-induced macropinocytosis                                | [27-29] |
| 18 | KCNQ5  | potassium voltage-gated channel subfamily Q member 5     | Protein yields currents that activate slowly with depolarization and can form heteromeric                                                                                                      | [30]    |

|    |       |                                                                  |                                                                                                                                                                                                                                             |         |
|----|-------|------------------------------------------------------------------|---------------------------------------------------------------------------------------------------------------------------------------------------------------------------------------------------------------------------------------------|---------|
|    |       |                                                                  | channels with the protein encoded by the KCNQ3 gene                                                                                                                                                                                         |         |
| 19 | TRPA1 | transient receptor potential cation channel subfamily A member 1 | May involve a role in signal transduction and growth control                                                                                                                                                                                | [31]    |
| 20 | TRPM4 | transient receptor potential cation channel subfamily M member 4 | Calcium-activated nonselective ion channel that mediates transport of monovalent cations across membranes, thereby depolarizing the membrane                                                                                                | [32,33] |
| 21 | TRPM7 | transient receptor potential cation channel subfamily M member 7 | Protein is both, an ion channel and a serine/threonine protein kinase. The kinase activity is essential for the ion channel function, which serves to increase intracellular calcium levels and to help regulate magnesium ion homeostasis. | [34]    |
| 22 | VDAC2 | voltage dependent anion channel 2                                | Involvement of Ca <sup>+2</sup> in viral entry                                                                                                                                                                                              | [35,36] |
| 23 | VDAC3 | voltage dependent anion channel 3                                | Involvement of Ca <sup>+2</sup> in viral entry                                                                                                                                                                                              | [37]    |

|    |          |                                                               |                                                                                                                                    |         |
|----|----------|---------------------------------------------------------------|------------------------------------------------------------------------------------------------------------------------------------|---------|
| 24 | CLIC1    | chloride voltage-gated channel 1                              | Protein localizes principally to the cell nucleus and exhibits both nuclear and plasma membrane chloride ion channel activity      | [38]    |
| 25 | CLCN2    | chloride voltage-gated channel 2                              | Transmembrane protein that maintains chloride ion homeostasis in various cells                                                     | [39]    |
| 26 | CLCN7    | chloride voltage-gated channel 7                              | Functions as antiporter and contributes to the acidification of the lysosome lumen and may be involved in maintaining lysosomal pH | [40]    |
| 27 | CACNA2D1 | calcium voltage-gated channel auxiliary subunit alpha2delta 1 | Calcium channels mediate the influx of calcium ions into the cell upon membrane polarization                                       | [41]    |
| 28 | CACNG6   | calcium voltage-gated channel auxiliary subunit gamma 6       | Regulates the activity of L-type calcium channels that contain CACNA1C as pore-forming subunit                                     | [42]    |
| 29 | GJA1     | gap junction protein alpha 1                                  | Protein is a component of gap junctions, composed of arrays                                                                        | [43,44] |

|    |       |                                    |                                                                                                                                                                                                                                                                                                          |      |
|----|-------|------------------------------------|----------------------------------------------------------------------------------------------------------------------------------------------------------------------------------------------------------------------------------------------------------------------------------------------------------|------|
|    |       |                                    | <p>of intercellular channels that provide a route for the diffusion of low molecular weight materials from cell to cell. Major protein of gap junctions in the heart that have crucial role in the synchronized contraction of the heart</p>                                                             |      |
| 30 | GJC1  | gap junction protein gamma 1       | <p>Protein is a component of gap junctions, composed of arrays of intercellular channels that provide a route for the diffusion of low molecular weight materials from cell to cell. Major protein of gap junctions in the heart that have crucial role in the synchronized contraction of the heart</p> | [45] |
| 31 | ASIC1 | acid sensing ion channel subunit 1 | <p>Part of the degenerin/epithelial sodium channel (DEG/ENaC) superfamily. Proteins function in learning, pain</p>                                                                                                                                                                                       | [46] |

|    |        |                                                                                    |                                                                                                                                                   |      |
|----|--------|------------------------------------------------------------------------------------|---------------------------------------------------------------------------------------------------------------------------------------------------|------|
|    |        |                                                                                    | transduction, touch sensation, and development of memory and fear                                                                                 |      |
| 32 | PKD2   | polycystin 2, transient receptor potential cation channel                          | Multi-pass membrane protein that functions as a calcium permeable cation channel                                                                  | [47] |
| 33 | GABRA5 | gamma-aminobutyric acid type A receptor alpha5 subunit                             | Ligand-gated chloride channel subunit which is a component of the heteropentameric receptor for GABA; may be involved in GABA-A receptor assembly | [48] |
| 34 | TPCN1  | two pore segment channel 1                                                         | Function as one of the major voltage-gated Ca <sup>2+</sup> channels (VDCC) across the lysosomal and endosomal membrane                           | [49] |
| 35 | HCN2   | hyperpolarization activated cyclic nucleotide gated potassium and sodium channel 2 | Ion channel exhibiting weak selectivity for potassium over sodium ions. Contributes to the native pacemaker currents in heart                     | [50] |
| 36 | SCN9A  | sodium voltage-gated channel alpha subunit 9                                       | Protein forms a sodium-selective channel through                                                                                                  | [51] |



|    |        |                                                    |                                                                                                                             |      |
|----|--------|----------------------------------------------------|-----------------------------------------------------------------------------------------------------------------------------|------|
|    |        |                                                    | which Na <sup>+</sup> ions may pass in accordance with their electrochemical gradient                                       |      |
| 37 | GLRB   | glycine receptor beta                              | GLRB does not form ligand-gated ion channels by itself, but is part of heteromeric ligand-gated chloride channels           | [52] |
| 38 | GRID1  | glutamate ionotropic receptor delta type subunit 1 | Subunit of glutamate receptor channels; play key roles in synaptic plasticity                                               | [48] |
| 39 | CHRNA5 | cholinergic receptor nicotinic alpha 5 subunit     | Protein subunit is a member of a superfamily of ligand-gated ion channels that mediate fast signal transmission at synapses | [53] |
| 40 | MCOLN3 | mucolipin 3                                        | Acts as Ca <sup>2+</sup> -permeable cation channel with inwardly rectifying activity                                        | [54] |

**Table S3:** A list of drugs interacting with HICs

|   | Compound Name          | Compound Structure                                                                   | Human Protein | Viral Protein                                              |
|---|------------------------|--------------------------------------------------------------------------------------|---------------|------------------------------------------------------------|
| 1 | Adenosine Diphosphate  | 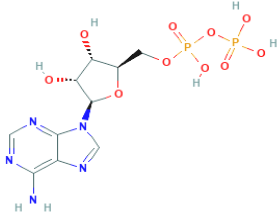   | TRPM4         | ORF8,ORF14,<br>M, E, S,<br>ORF7a,<br>ORF7b, nsp4,<br>nsp6, |
| 2 | Clotrimazole           |     |               |                                                            |
| 3 | Adenosine              |   |               |                                                            |
| 4 | Adenosine Triphosphate |  |               |                                                            |
| 5 | Glyburide              |   |               |                                                            |

|    |              |                                                                                     |       |      |
|----|--------------|-------------------------------------------------------------------------------------|-------|------|
| 6  | Spermine     | 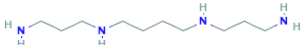  |       |      |
| 7  | Thymol       |    | TRPA1 | nsp4 |
| 8  | Benzoquinone |   |       |      |
| 9  | Chloropicrin |  |       |      |
| 10 | Allicin      |  |       |      |

|    |                 |                                                                                     |  |  |
|----|-----------------|-------------------------------------------------------------------------------------|--|--|
| 11 | Morphanthridine | 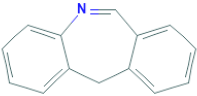   |  |  |
| 12 | Polygodial      |    |  |  |
| 13 | Methylglyoxal   |    |  |  |
| 14 | Isovelleral     |  |  |  |
| 15 | Acrolein        |  |  |  |
| 16 | Nicotine        |  |  |  |

|    |                |                                                                                     |  |  |
|----|----------------|-------------------------------------------------------------------------------------|--|--|
| 17 | Menthol        | 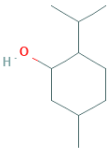   |  |  |
| 18 | Acetaldehyde   |    |  |  |
| 19 | Salirasib      |    |  |  |
| 20 | Auranofin      |  |  |  |
| 21 | Apomorphine    |  |  |  |
| 22 | Cannabidivarin |  |  |  |

|    |                         |                                                                                     |  |  |
|----|-------------------------|-------------------------------------------------------------------------------------|--|--|
| 23 | Tetrahydrocannabivarin  | 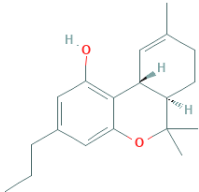   |  |  |
| 24 | Levomenthol             |    |  |  |
| 25 | Butamben                |    |  |  |
| 26 | Camphor                 |  |  |  |
| 27 | Cannabidiol             |  |  |  |
| 28 | Nabiximols              |  |  |  |
| 29 | Phenethylisothiocyanate |  |  |  |

|    |                          |                                                                                     |  |  |
|----|--------------------------|-------------------------------------------------------------------------------------|--|--|
| 30 | Benzyl isothiocyanate    | 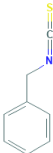   |  |  |
| 31 | Isopropyl isothiocyanate |    |  |  |
| 32 | Voacangine               |    |  |  |
| 33 | Erucin                   |  |  |  |
| 34 | Allyl isothiocyanate     |  |  |  |
| 35 | 4-Hydroxynon-2-enal      |  |  |  |
|    |                          |                                                                                     |  |  |

|    |                          |                                                                                     |      |                                                     |
|----|--------------------------|-------------------------------------------------------------------------------------|------|-----------------------------------------------------|
| 36 | Carbenoxolone            | 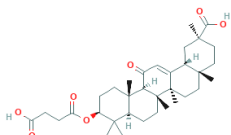   | GJA1 | M, ORF7a,<br>ORF7b, nsp4,<br>nsp6, ORF14,<br>ORF3b, |
| 37 | Octanol                  |    |      |                                                     |
| 38 | Carvedilol               |    |      |                                                     |
| 39 | Epigallocatechin Gallate |  |      |                                                     |
| 40 | Bleomycin                |  |      |                                                     |
| 41 | Propylthiouracil         |  |      |                                                     |



|    |               |                                                                                     |       |                                             |
|----|---------------|-------------------------------------------------------------------------------------|-------|---------------------------------------------|
| 42 | Labetalol     | 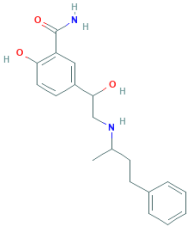   |       |                                             |
| 43 | Atenolol      |    |       |                                             |
|    |               |                                                                                     |       |                                             |
| 44 | Chlorzoxazone |    | KCNN4 | M, E, S,<br>ORF7a,<br>ORF7b, nsp4,<br>nsp6, |
| 45 | Senicapoc     |  |       |                                             |
| 46 | Clotrimazole  |  |       |                                             |
| 47 | Nitredipine   | NA                                                                                  |       |                                             |

|    |            |                                                                                     |       |                                    |
|----|------------|-------------------------------------------------------------------------------------|-------|------------------------------------|
| 48 | Riluzole   | 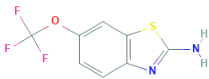   |       |                                    |
| 49 | Quinine    |    |       |                                    |
| 50 | Halothane  |    |       |                                    |
|    |            |                                                                                     |       |                                    |
| 51 | Diminazene |  | ASIC1 | E, ORF7a, ORF7b, nsp4, nsp6, ORF8, |
| 52 | Amiloride  |  |       |                                    |
| 53 | Ibuprofen  |  |       |                                    |

|    |                        |                                                                                     |       |                              |
|----|------------------------|-------------------------------------------------------------------------------------|-------|------------------------------|
| 54 | Nafamostat             | 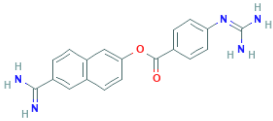   |       |                              |
| 55 | Benzamil               |    |       |                              |
| 56 | Caffeine               |   | ITPR1 | M, E, ORF7a,<br>ORF7b, nsp4, |
| 57 | Adenosine Triphosphate |  |       |                              |
| 58 | Nitroprusside          |  |       |                              |
| 59 | Glycerin               |  |       |                              |

## References

1. Atakpa, P.; Thillaiappan, N.B.; Mataragka, S.; Prole, D.L.; Taylor, C.W. IP3 Receptors Preferentially Associate with ER-Lysosome Contact Sites and Selectively Deliver Ca(2+) to Lysosomes. *Cell Rep* **2018**, *25*, 3180-3193 e3187, doi:10.1016/j.celrep.2018.11.064.
2. Wiel, C.; Lallet-Daher, H.; Gitenay, D.; Gras, B.; Le Calve, B.; Augert, A.; Ferrand, M.; Prevarskaya, N.; Simonnet, H.; Vindrieux, D.; et al. Endoplasmic reticulum calcium release through ITPR2 channels leads to mitochondrial calcium accumulation and senescence. *Nat Commun* **2014**, *5*, 3792, doi:10.1038/ncomms4792.
3. Vervloessem, T.; Yule, D.I.; Bultynck, G.; Parys, J.B. The type 2 inositol 1,4,5-trisphosphate receptor, emerging functions for an intriguing Ca(2+)-release channel. *Biochim Biophys Acta* **2015**, *1853*, 1992-2005, doi:10.1016/j.bbamcr.2014.12.006.
4. Kuchay, S.; Saeed, M.; Giorgi, C.; Li, J.; Hoffmann, H.H.; Pinton, P.; Rice, C.M.; Pagano, M. NS5A Promotes Constitutive Degradation of IP3R3 to Counteract Apoptosis Induced by Hepatitis C Virus. *Cell Rep* **2018**, *25*, 833-840 e833, doi:10.1016/j.celrep.2018.09.088.
5. Oh, U.; Jung, J. Cellular functions of TMEM16/anoctamin. *Pflugers Arch* **2016**, *468*, 443-453, doi:10.1007/s00424-016-1790-0
6. Lin, H.; Jun, I.; Woo, J.H.; Lee, M.G.; Kim, S.J.; Nam, J.H. Temperature-dependent increase in the calcium sensitivity and acceleration of activation of ANO6 chloride channel variants. *Sci Rep* **2019**, *9*, 6706, doi:10.1038/s41598-019-43162-1
7. Veit, M.; Koyro, K.I.; Ahrens, B.; Bleibaum, F.; Munz, M.; Rovekamp, H.; Andra, J.; Schreiber, R.; Kunzelmann, K.; Sommer, A.; et al. Anoctamin-6 regulates ADAM sheddase function. *Biochim Biophys Acta Mol Cell Res* **2018**, *1865*, 1598-1610, doi:10.1016/j.bbamcr.2018.08.011.
8. Lin, H.; Roh, J.; Woo, J.H.; Kim, S.J.; Nam, J.H. TMEM16F/ANO6, a Ca(2+)-activated anion channel, is negatively regulated by the actin cytoskeleton and intracellular MgATP. *Biochem Biophys Res Commun* **2018**, *503*, 2348-2354, doi:10.1016/j.bbrc.2018.06.160.
9. Jha, A.; Chung, W.Y.; Vachel, L.; Maleth, J.; Lake, S.; Zhang, G.; Ahuja, M.; Muallem, S. Anoctamin 8 tethers endoplasmic reticulum and plasma membrane for assembly of Ca(2+) signaling complexes at the ER/PM compartment. *EMBO J* **2019**, *38*, doi:10.15252/emboj.2018101452.
10. Bushell, S.R.; Pike, A.C.W.; Falzone, M.E.; Rorsman, N.J.G.; Ta, C.M.; Corey, R.A.; Newport, T.D.; Christianson, J.C.; Scofano, L.F.; Shintre, C.A.; et al. The structural basis of lipid scrambling and inactivation in the endoplasmic reticulum scramblase TMEM16K. *Nat Commun* **2019**, *10*, 3956, doi:10.1038/s41467-019-11753-1
11. Ishihara, K.; Suzuki, J.; Nagata, S. Role of Ca(2+) in the Stability and Function of TMEM16F and 16K. *Biochemistry* **2016**, *55*, 3180-3188, doi:10.1021/acs.biochem.6b00176.
12. Chen, L.; Konig, B.; Liu, T.; Pervaiz, S.; Razzaque, Y.S.; Stauber, T. More than just a pressure relief valve: physiological roles of volume-regulated LRRC8 anion channels. *Biol Chem* **2019**, *400*, 1481-1496, doi:10.1515/hsz-2019-0189
13. Lu, J.; Xu, F.; Zhang, J. Inhibition of angiotensin II-induced cerebrovascular smooth muscle cell proliferation by LRRC8A downregulation through suppressing PI3K/AKT activation. *Hum Cell* **2019**, *32*, 316-325, doi:10.1007/s13577-019-00260-6
14. Voss, F.K.; Ullrich, F.; Munch, J.; Lazarow, K.; Lutter, D.; Mah, N.; Andrade-Navarro, M.A.; von Kries, J.P.; Stauber, T.; Jentsch, T.J. Identification of LRRC8 heteromers as an essential component of the volume-regulated anion channel VRAC. *Science* **2014**, *344*, 634-638, doi:10.1126/science.1252826.
15. Syeda, R.; Qiu, Z.; Dubin, A.E.; Murthy, S.E.; Florendo, M.N.; Mason, D.E.; Mathur, J.; Cahalan, S.M.; Peters, E.C.; Montal, M.; et al. LRRC8 Proteins Form Volume-Regulated Anion Channels that Sense Ionic Strength. *Cell* **2016**, *164*, 499-511, doi:10.1016/j.cell.2015.12.031.
16. Lutter, D.; Ullrich, F.; Lueck, J.C.; Kempa, S.; Jentsch, T.J. Selective transport of neurotransmitters and modulators by distinct volume-regulated LRRC8 anion channels. *J Cell Sci* **2017**, *130*, 1122-1133, doi:10.1242/jcs.196253.

17. Lee, C.C.; Freinkman, E.; Sabatini, D.M.; Ploegh, H.L. The protein synthesis inhibitor blasticidin s enters mammalian cells via leucine-rich repeat-containing protein 8D. *J Biol Chem* **2014**, *289*, 17124-17131, doi:10.1074/jbc.M114.571257.
18. Schober, A.L.; Wilson, C.S.; Mongin, A.A. Molecular composition and heterogeneity of the LRRC8-containing swelling-activated osmolyte channels in primary rat astrocytes. *J Physiol* **2017**, *595*, 6939-6951, doi:10.1113/JP275053.
19. Fu, J.; Dai, X.; Plummer, G.; Suzuki, K.; Bautista, A.; Githaka, J.M.; Senior, L.; Jensen, M.; Greitzer-Antes, D.; Manning Fox, J.E.; et al. Kv2.1 Clustering Contributes to Insulin Exocytosis and Rescues Human beta-Cell Dysfunction. *Diabetes* **2017**, *66*, 1890-1900, doi:10.2337/db16-1170.
20. Yan, L.; Figueroa, D.J.; Austin, C.P.; Liu, Y.; Bugianesi, R.M.; Slaughter, R.S.; Kaczorowski, G.J.; Kohler, M.G. Expression of voltage-gated potassium channels in human and rhesus pancreatic islets. *Diabetes* **2004**, *53*, 597-607, doi:10.2337/diabetes.53.3.597.
21. Mederos, Y.S.M.; Rinne, S.; Skrobek, L.; Renigunta, V.; Schlichtorl, G.; Derst, C.; Gudermann, T.; Daut, J.; Preisig-Muller, R. Mutation of histidine 105 in the T1 domain of the potassium channel Kv2.1 disrupts heteromerization with Kv6.3 and Kv6.4. *J Biol Chem* **2009**, *284*, 4695-4704, doi:10.1074/jbc.M808786200.
22. Du, Q.; Jovanovic, S.; Tulic, L.; Sljivancanin, D.; Jack, D.W.; Zizic, V.; Abdul, K.S.; Tulic, I.; Jovanovic, A. KATP channels are up-regulated with increasing age in human myometrium. *Mech Ageing Dev* **2013**, *134*, 98-102, doi:10.1016/j.mad.2013.01.003.
23. Delaney, J.T.; Muhammad, R.; Blair, M.A.; Kor, K.; Fish, F.A.; Roden, D.M.; Darbar, D. A KCNJ8 mutation associated with early repolarization and atrial fibrillation. *Europace* **2012**, *14*, 1428-1432, doi:10.1093/europace/eus150.
24. Babenko, A.P.; Gonzalez, G.; Aguilar-Bryan, L.; Bryan, J. Reconstituted human cardiac KATP channels: functional identity with the native channels from the sarcolemma of human ventricular cells. *Circ Res* **1998**, *83*, 1132-1143, doi:10.1161/01.res.83.11.1132.
25. Tammaro, P.; Ashcroft, F.M. A mutation in the ATP-binding site of the Kir6.2 subunit of the KATP channel alters coupling with the SUR2A subunit. *J Physiol* **2007**, *584*, 743-753, doi:10.1113/jphysiol.2007.143149.
26. Cooper, P.E.; McClenaghan, C.; Chen, X.; Stry-Weinzinger, A.; Nichols, C.G. Conserved functional consequences of disease-associated mutations in the slide helix of Kir6.1 and Kir6.2 subunits of the ATP-sensitive potassium channel. *J Biol Chem* **2017**, *292*, 17387-17398, doi:10.1074/jbc.M117.804971.
27. Srivastava, S.; Li, Z.; Ko, K.; Choudhury, P.; Albaqumi, M.; Johnson, A.K.; Yan, Y.; Backer, J.M.; Unutmaz, D.; Coetzee, W.A.; et al. Histidine phosphorylation of the potassium channel KCa3.1 by nucleoside diphosphate kinase B is required for activation of KCa3.1 and CD4 T cells. *Mol Cell* **2006**, *24*, 665-675, doi:10.1016/j.molcel.2006.11.012.
28. Srivastava, S.; Zhdanova, O.; Di, L.; Li, Z.; Albaqumi, M.; Wulff, H.; Skolnik, E.Y. Protein histidine phosphatase 1 negatively regulates CD4 T cells by inhibiting the K<sup>+</sup> channel KCa3.1. *Proc Natl Acad Sci U S A* **2008**, *105*, 14442-14446, doi:10.1073/pnas.0803678105.
29. Maekawa, M.; Terasaka, S.; Mochizuki, Y.; Kawai, K.; Ikeda, Y.; Araki, N.; Skolnik, E.Y.; Taguchi, T.; Arai, H. Sequential breakdown of 3-phosphorylated phosphoinositides is essential for the completion of macropinocytosis. *Proc Natl Acad Sci U S A* **2014**, *111*, E978-987, doi:10.1073/pnas.1311029111.
30. Zhang, Y.; Chu, X.; Liu, L.; Zhang, N.; Guo, H.; Yang, F.; Liu, Z.; Dong, Y.; Bao, Y.; Zhang, X.; et al. Tannic acid activates the Kv7.4 and Kv7.3/7.5 K(+) channels expressed in HEK293 cells and reduces tension in the rat mesenteric arteries. *J Pharm Pharmacol* **2016**, *68*, 494-502, doi:10.1111/jphp.12527.
31. Zhao, J.; Lin King, J.V.; Paulsen, C.E.; Cheng, Y.; Julius, D. Irritant-evoked activation and calcium modulation of the TRPA1 receptor. *Nature* **2020**, *585*, 141-145, doi:10.1038/s41586-020-2480-9

32. Xian, W.; Wang, H.; Moretti, A.; Laugwitz, K.L.; Flockerzi, V.; Lipp, P. Domain zipping and unzipping modulates TRPM4's properties in human cardiac conduction disease. *FASEB J* **2020**, *34*, 12114-12126, doi:10.1096/fj.202000097RR.
33. Jha, R.M.; Desai, S.M.; Zusman, B.E.; Koleck, T.A.; Puccio, A.M.; Okonkwo, D.O.; Park, S.Y.; Shutter, L.A.; Kochanek, P.M.; Conley, Y.P. Downstream TRPM4 Polymorphisms Are Associated with Intracranial Hypertension and Statistically Interact with ABCC8 Polymorphisms in a Prospective Cohort of Severe Traumatic Brain Injury. *J Neurotrauma* **2019**, *36*, 1804-1817, doi:10.1089/neu.2018.6124.
34. Lee, C.T.; Ng, H.Y.; Kuo, W.H.; Tain, Y.L.; Leung, F.F.; Lee, Y.T. The role of TRPM7 in vascular calcification: Comparison between phosphate and uremic toxin. *Life Sci* **2020**, *260*, 118280, doi:10.1016/j.lfs.2020.118280.
35. Luzio, J.P.; Bright, N.A.; Pryor, P.R. The role of calcium and other ions in sorting and delivery in the late endocytic pathway. *Biochem Soc Trans* **2007**, *35*, 1088-1091, doi:10.1042/BST0351088.
36. Fujioka, Y.; Nishide, S.; Ose, T.; Suzuki, T.; Kato, I.; Fukuhara, H.; Fujioka, M.; Horiuchi, K.; Satoh, A.O.; Nepal, P.; et al. A Sialylated Voltage-Dependent Ca(2+) Channel Binds Hemagglutinin and Mediates Influenza A Virus Entry into Mammalian Cells. *Cell Host Microbe* **2018**, *23*, 809-818 e805, doi:10.1016/j.chom.2018.04.015.
37. Jitobaom, K.; Tongluan, N.; Smith, D.R. Involvement of voltage-dependent anion channel (VDAC) in dengue infection. *Sci Rep* **2016**, *6*, 35753, doi:10.1038/srep35753.
38. Muller, M.; Slivinski, N.; Todd, E.; Khalid, H.; Li, R.; Karwatka, M.; Merits, A.; Mankouri, J.; Tuplin, A. Chikungunya virus requires cellular chloride channels for efficient genome replication. *PLoS Negl Trop Dis* **2019**, *13*, e0007703, doi:10.1371/journal.pntd.0007703.
39. Hansen, T.H.; Yan, Y.; Ahlberg, G.; Vad, O.B.; Refsgaard, L.; Dos Santos, J.L.; Mutsaers, N.; Svendsen, J.H.; Olesen, M.S.; Bentzen, B.H.; et al. A Novel Loss-of-Function Variant in the Chloride Ion Channel Gene *Clcn2* Associates with Atrial Fibrillation. *Sci Rep* **2020**, *10*, 1453, doi:10.1038/s41598-020-58475-9
40. Leisle, L.; Ludwig, C.F.; Wagner, F.A.; Jentsch, T.J.; Stauber, T. ClC-7 is a slowly voltage-gated 2Cl(-)/1H(+)-exchanger and requires Ostm1 for transport activity. *EMBO J* **2011**, *30*, 2140-2152, doi:10.1038/emboj.2011.137.
41. Bourdin, B.; Shakeri, B.; Tetreault, M.P.; Sauve, R.; Lesage, S.; Parent, L. Functional characterization of CaValpha2delta mutations associated with sudden cardiac death. *J Biol Chem* **2015**, *290*, 2854-2869, doi:10.1074/jbc.M114.597930.
42. Yang, L.; Katchman, A.; Morrow, J.P.; Doshi, D.; Marx, S.O. Cardiac L-type calcium channel (Cav1.2) associates with gamma subunits. *FASEB J* **2011**, *25*, 928-936, doi:10.1096/fj.10-172353.
43. Martins-Marques, T.; Catarino, S.; Goncalves, A.; Miranda-Silva, D.; Goncalves, L.; Antunes, P.; Coutinho, G.; Leite Moreira, A.; Falcao Pires, I.; Girao, H. EHD1 Modulates Cx43 Gap Junction Remodeling Associated With Cardiac Diseases. *Circ Res* **2020**, *126*, e97-e113, doi:10.1161/CIRCRESAHA.119.316502.
44. Brink, P.R.; Valiunas, V.; White, T.W. Lens Connexin Channels Show Differential Permeability to Signaling Molecules. *Int J Mol Sci* **2020**, *21*, doi:10.3390/ijms21186943.
45. Ye, W.G.; Yue, B.; Aoyama, H.; Kim, N.K.; Cameron, J.A.; Chen, H.; Bai, D. Junctional delay, frequency, and direction-dependent uncoupling of human heterotypic Cx45/Cx43 gap junction channels. *J Mol Cell Cardiol* **2017**, *111*, 17-26, doi:10.1016/j.yjmcc.2017.07.117.
46. Waldmann, R.; Champigny, G.; Bassilana, F.; Heurteaux, C.; Lazdunski, M. A proton-gated cation channel involved in acid-sensing. *Nature* **1997**, *386*, 173-177, doi:10.1038/386173a0.
47. Pena-Oyarzun, D.; Batista-Gonzalez, A.; Kretschmar, C.; Burgos, P.; Lavandero, S.; Morselli, E.; Criollo, A. New emerging roles of Polycystin-2 in the regulation of autophagy. *Int Rev Cell Mol Biol* **2020**, *354*, 165-186, doi:10.1016/bs.ircmb.2020.02.006.
48. Huttlin, E.L.; Bruckner, R.J.; Paulo, J.A.; Cannon, J.R.; Ting, L.; Baltier, K.; Colby, G.; Gebreab, F.; Gygi, M.P.; Parzen, H.; et al. Architecture of the human interactome defines protein communities and disease networks. *Nature* **2017**, *545*, 505-509, doi:10.1038/nature22366.

49. Brailoiu, E.; Churamani, D.; Cai, X.; Schrlau, M.G.; Brailoiu, G.C.; Gao, X.; Hooper, R.; Boulware, M.J.; Dun, N.J.; Marchant, J.S.; et al. Essential requirement for two-pore channel 1 in NAADP-mediated calcium signaling. *J Cell Biol* **2009**, *186*, 201-209, doi:10.1083/jcb.200904073.
50. Ludwig, A.; Zong, X.; Stieber, J.; Hullin, R.; Hofmann, F.; Biel, M. Two pacemaker channels from human heart with profoundly different activation kinetics. *EMBO J* **1999**, *18*, 2323-2329, doi:10.1093/emboj/18.9.2323.
51. Ahuja, S.; Mukund, S.; Deng, L.; Khakh, K.; Chang, E.; Ho, H.; Shriver, S.; Young, C.; Lin, S.; Johnson, J.P., Jr.; et al. Structural basis of Nav1.7 inhibition by an isoform-selective small-molecule antagonist. *Science* **2015**, *350*, aac5464, doi:10.1126/science.aac5464.
52. Handford, C.A.; Lynch, J.W.; Baker, E.; Webb, G.C.; Ford, J.H.; Sutherland, G.R.; Schofield, P.R. The human glycine receptor beta subunit: primary structure, functional characterisation and chromosomal localisation of the human and murine genes. *Brain Res Mol Brain Res* **1996**, *35*, 211-219, doi:10.1016/0169-328X(95)00218-H [pii].
53. Coverstone, E.D.; Bach, R.G.; Chen, L.; Bierut, L.J.; Li, A.Y.; Lenzini, P.A.; O'Neill, H.C.; Spertus, J.A.; Sucharov, C.C.; Stitzel, J.A.; et al. A novel genetic marker of decreased inflammation and improved survival after acute myocardial infarction. *Basic Res Cardiol* **2018**, *113*, 38, doi:10.1007/s00395-018-0697-7
54. Martina, J.A.; Lelouvier, B.; Puertollano, R. The calcium channel mucolipin-3 is a novel regulator of trafficking along the endosomal pathway. *Traffic* **2009**, *10*, 1143-1156, doi:10.1111/j.1600-0854.2009.00935.x.
